# Supplementary material
Source: MDPI journal article supplement (https://www.mdpi.com/2075-163X/9/12/790)
Supplement: s1 [file s1]

# The High-Pressure Structural Evolution of Olivine along the Forsterite–Fayalite Join

Martha G. Pamato <sup>1,\*</sup>, Fabrizio Nestola <sup>1</sup>, Davide Novella <sup>2</sup>, Joseph R. Smyth <sup>3</sup>, Daria Pasqual <sup>1</sup>, G. Diego Gatta <sup>4</sup>, Matteo Alvaro <sup>2</sup> and Luciano Secco <sup>1</sup>

<sup>1</sup> Department of Geosciences, University of Padova, Via G. Gradenigo 6, 35131 Padova, Italy; fabrizio.nestola@unipd.it (F.N.); daria.pasqual@unipd.it (D.P.); luciano.secco@unipd.it (L.S.)

<sup>2</sup> Department of Earth and Environmental Sciences, University of Pavia, Via A. Ferrata 1, 27100 Pavia, Italy; davide.novella@unipv.it (D.N.); matteo.alvaro@unipv.it (M.A.)

<sup>3</sup> Department of Geological Sciences, University of Colorado, Boulder, 2200 Colorado Ave, 80309 Colorado, USA; smyth@colorado.edu

<sup>4</sup> Department of Earth Sciences, University of Milan, Via Botticelli 23, 20133 Milan, Italy; diego.gatta@unimi.it

\* Correspondence: martha.pamato@unipd.it

**Table S1a.** Bond lengths (Å) and polyhedral data for Fo<sub>100</sub>.

| <i>P</i> (GPa)             | 0        | 1.22(5)  | 2.04(5)  | 2.67(5)  | 3.28(5)  | 4.82(5)  | 6.29(5)  | 7.23(5)  | 7.98(5)  |
|----------------------------|----------|----------|----------|----------|----------|----------|----------|----------|----------|
| M2-O1(Å)                   | 2.180(5) | 2.164(6) | 2.165(5) | 2.151(6) | 2.150(5) | 2.130(5) | 2.132(6) | 2.120(5) | 2.119(5) |
| M2-O2(Å)                   | 2.044(5) | 2.040(6) | 2.030(5) | 2.035(6) | 2.034(5) | 2.019(5) | 2.020(6) | 2.008(5) | 2.004(5) |
| M2-O3l(Å) × 2              | 2.215(4) | 2.201(5) | 2.196(4) | 2.193(5) | 2.190(4) | 2.187(4) | 2.177(5) | 2.161(4) | 2.162(4) |
| M2-O3s(Å) × 2              | 2.064(5) | 2.059(6) | 2.055(4) | 2.053(6) | 2.046(5) | 2.033(5) | 2.028(6) | 2.028(5) | 2.022(5) |
| <M2-O>                     | 2.130    | 2.121    | 2.116    | 2.113    | 2.109    | 2.098    | 2.094    | 2.084    | 2.082    |
| <i>V</i> (Å <sup>3</sup> ) | 12.43(6) | 12.31(6) | 12.20(5) | 12.14(2) | 12.09(6) | 11.91(6) | 11.84(7) | 11.70(5) | 11.65(5) |
| Vol. distort.              | 0.0229   | 0.0215   | 0.0220   | 0.0222   | 0.0216   | 0.0204   | 0.0204   | 0.0196   | 0.0193   |
| M1-O1(Å) × 2               | 2.089(3) | 2.077(4) | 2.074(3) | 2.068(4) | 2.067(4) | 2.060(3) | 2.051(4) | 2.048(3) | 2.043(3) |
| M1-O2(Å) × 2               | 2.069(3) | 2.062(4) | 2.062(3) | 2.059(4) | 2.051(3) | 2.050(3) | 2.043(4) | 2.036(3) | 2.034(3) |
| M1-O3(Å) × 2               | 2.133(3) | 2.128(4) | 2.122(3) | 2.117(4) | 2.116(3) | 2.112(3) | 2.104(4) | 2.096(3) | 2.092(3) |
| <M1-O>                     | 2.097    | 2.089    | 2.086    | 2.081    | 2.078    | 2.074    | 2.066    | 2.060    | 2.056    |
| <i>V</i> (Å <sup>3</sup> ) | 11.82(4) | 11.72(4) | 11.67(4) | 11.58(4) | 11.54(4) | 11.48(4) | 11.34(5) | 11.26(3) | 11.20(4) |
| Vol. distort.              | 0.0382   | 0.0362   | 0.0354   | 0.0367   | 0.0359   | 0.0355   | 0.0360   | 0.0331   | 0.0336   |
| T-O1(Å)                    | 1.611(5) | 1.619(6) | 1.613(4) | 1.619(6) | 1.615(5) | 1.616(5) | 1.608(6) | 1.608(5) | 1.606(5) |
| T-O2(Å)                    | 1.657(5) | 1.663(6) | 1.666(4) | 1.656(6) | 1.659(5) | 1.662(5) | 1.646(6) | 1.663(5) | 1.656(5) |
| T-O3(Å) × 2                | 1.638(5) | 1.639(6) | 1.636(4) | 1.636(6) | 1.633(5) | 1.630(5) | 1.629(6) | 1.629(5) | 1.627(5) |
| <T-O>                      | 1.636    | 1.640    | 1.638    | 1.637    | 1.635    | 1.635    | 1.628    | 1.632    | 1.629    |
| <i>V</i> (Å <sup>3</sup> ) | 2.21(2)  | 2.22(2)  | 2.22(2)  | 2.21(2)  | 2.21(2)  | 2.20(2)  | 2.18(2)  | 2.19(2)  | 2.18(2)  |
| Vol. distort.              | 0.0127   | 0.0128   | 0.0127   | 0.0143   | 0.0141   | 0.0137   | 0.0147   | 0.0144   | 0.0147   |

**Table S1b.** Bond lengths (Å) and polyhedral data for Fo<sub>80</sub>.

| <b>P (GPa)</b>     | <b>0</b> | <b>1.06(5)</b> | <b>1.69(5)</b> | <b>3.00(5)</b> | <b>3.71(5)</b> | <b>5.78(5)</b> | <b>7.66(5)</b> |
|--------------------|----------|----------------|----------------|----------------|----------------|----------------|----------------|
| M2-O1(Å)           | 2.190(8) | 2.169(5)       | 2.174(5)       | 2.167(5)       | 2.152(6)       | 2.146(7)       | 2.136(6)       |
| M2-O2(Å)           | 2.068(9) | 2.058(5)       | 2.050(5)       | 2.040(5)       | 2.041(6)       | 2.042(6)       | 2.020(6)       |
| M2-O3l(Å) × 2      | 2.240(6) | 2.224(4)       | 2.216(4)       | 2.214(4)       | 2.204(4)       | 2.198(5)       | 2.194(5)       |
| M2-O3s(Å) × 2      | 2.053(6) | 2.063(4)       | 2.057(4)       | 2.051(4)       | 2.052(5)       | 2.037(6)       | 2.025(6)       |
| <M2-O>             | 2.141    | 2.134          | 2.128          | 2.123          | 2.118          | 2.110          | 2.099          |
| V(Å <sup>3</sup> ) | 12.60(8) | 12.46(5)       | 12.38(5)       | 12.28(5)       | 12.19(6)       | 12.08(7)       | 11.90(6)       |
| Vol. distort.      | 0.0218   | 0.0245         | 0.0236         | 0.0235         | 0.0242         | 0.0222         | 0.0210         |
| M1-O1(Å) × 2       | 2.107(5) | 2.091(3)       | 2.088(3)       | 2.083(3)       | 2.081(4)       | 2.061(4)       | 2.061(4)       |
| M1-O2(Å) × 2       | 2.075(6) | 2.079(3)       | 2.080(3)       | 2.077(3)       | 2.074(4)       | 2.056(4)       | 2.056(4)       |
| M1-O3(Å) × 2       | 2.154(5) | 2.149(3)       | 2.149(3)       | 2.139(3)       | 2.140(4)       | 2.120(4)       | 2.111(4)       |
| <M1-O>             | 2.112    | 2.106          | 2.106          | 2.100          | 2.098          | 2.079          | 2.076          |
| V(Å <sup>3</sup> ) | 12.08(6) | 11.94(4)       | 11.95(4)       | 11.86(4)       | 11.82(4)       | 11.51(5)       | 11.48(4)       |
| Vol. distort.      | 0.0379   | 0.0418         | 0.0399         | 0.0399         | 0.0402         | 0.0392         | 0.0376         |
| T-O1(Å)            | 1.602(8) | 1.623(5)       | 1.617(5)       | 1.605(4)       | 1.610(5)       | 1.615(7)       | 1.603(6)       |
| T-O2(Å)            | 1.661(9) | 1.649(5)       | 1.652(5)       | 1.650(5)       | 1.651(6)       | 1.642(7)       | 1.646(6)       |
| T-O3(Å) × 2        | 1.654(7) | 1.638(4)       | 1.640(4)       | 1.635(4)       | 1.628(5)       | 1.630(6)       | 1.625(6)       |
| <T-O>              | 1.643    | 1.637          | 1.637          | 1.631          | 1.629          | 1.629          | 1.625          |
| V(Å <sup>3</sup> ) | 2.24(2)  | 2.22(2)        | 2.22(2)        | 2.19(2)        | 2.19(2)        | 2.18(2)        | 2.16(2)        |
| Vol. distort.      | 0.0095   | 0.0135         | 0.0120         | 0.0120         | 0.0125         | 0.0152         | 0.0136         |

**Table 1c.** Bond lengths (Å) and polyhedral data for Fo<sub>62</sub>.

| <b>P (GPa)</b>     | <b>0</b>  | <b>0.76(5)</b> | <b>1.93(5)</b> | <b>2.86(5)</b> | <b>5.07(5)</b> | <b>7.46(5)*</b> | <b>8.34(5)</b> |
|--------------------|-----------|----------------|----------------|----------------|----------------|-----------------|----------------|
| M2-O1(Å)           | 2.212(16) | 2.195(15)      | 2.192(14)      | 2.201(17)      | 2.181(15)      | 2.150(12)       | 2.134(13)      |
| M2-O2(Å)           | 2.080(17) | 2.074(15)      | 2.072(15)      | 2.040(19)      | 2.038(17)      | 2.014(13)       | 2.033(14)      |
| M2-O3l(Å) × 2      | 2.249(9)  | 2.257(8)       | 2.253(8)       | 2.253(10)      | 2.221(9)       | 2.220(7)        | 2.206(7)       |
| M2-O3s(Å) × 2      | 2.079(7)  | 2.079(7)       | 2.070(6)       | 2.061(8)       | 2.048(7)       | 2.043(6)        | 2.040(6)       |
| <M2-O>             | 2.158     | 2.157          | 2.152          | 2.145          | 2.126          | 2.115           | 2.110          |
| V(Å <sup>3</sup> ) | 12.81(12) | 12.80(11)      | 12.70(10)      | 12.58(13)      | 12.30(11)      | 12.11(9)        | 12.04(9)       |
| Vol. distort.      | 0.0292    | 0.0281         | 0.0284         | 0.0271         | 0.0244         | 0.0240          | 0.0245         |
| M1-O1(Å) × 2       | 2.095(9)  | 2.101(8)       | 2.096(8)       | 2.076(10)      | 2.071(8)       | 2.064(7)        | 2.065(7)       |
| M1-O2(Å) × 2       | 2.105(8)  | 2.099(7)       | 2.095(7)       | 2.103(9)       | 2.090(8)       | 2.088(6)        | 2.080(6)       |
| M1-O3(Å) × 2       | 2.180(10) | 2.163(9)       | 2.165(8)       | 2.158(11)      | 2.154(10)      | 2.123(8)        | 2.126(8)       |
| <M1-O>             | 2.127     | 2.121          | 2.119          | 2.112          | 2.105          | 2.092           | 2.090          |
| V(Å <sup>3</sup> ) | 12.23(10) | 12.14(9)       | 12.10(9)       | 12.04(11)      | 11.94(10)      | 11.72(8)        | 11.66(8)       |
| Vol. distort.      | 0.0466    | 0.0454         | 0.0457         | 0.0420         | 0.0397         | 0.0395          | 0.0425         |
| T-O1(Å)            | 1.635(10) | 1.626(9)       | 1.619(9)       | 1.629(11)      | 1.619(9)       | 1.615(7)        | 1.614(8)       |
| T-O2(Å)            | 1.657(16) | 1.664(15)      | 1.662(14)      | 1.679(18)      | 1.663(16)      | 1.670(13)       | 1.651(13)      |
| T-O3(Å) × 2        | 1.622(9)  | 1.622(8)       | 1.613(8)       | 1.612(10)      | 1.635(9)       | 1.614(7)        | 1.613(7)       |
| <T-O>              | 1.634     | 1.634          | 1.627          | 1.633          | 1.638          | 1.628           | 1.626          |
| V(Å <sup>3</sup> ) | 2.20(4)   | 2.20(3)        | 2.18(3)        | 2.20(4)        | 2.22(4)        | 2.18(3)         | 2.16(3)        |
| Vol. distort.      | 0.0141    | 0.0143         | 0.0134         | 0.0122         | 0.0126         | 0.0133          | 0.0152         |

\*Data collected during decompression.
